# Supplementary material for: PSCA-targeted BPX-601 CAR T cells with pharmacological activation by rimiducid in metastatic pancreatic and prostate cancer: a phase 1 dose escalation trial
Source: Springer Nature journal article supplement (doi:10.1038/s41467-024-53220-6), 2024-12-30
Supplement: MOESM4 [file 41467_2024_53220_MOESM4_ESM.xlsx]

## Sheet: Fig1A
		mCRPC-5B-1	mCRPC-5B-2	mCRPC-5B-3	mCRPC-5C-1	mCRPC-5C-2	mCRPC-5C-3	mCRPC-5C-4	mCRPC-5C-5	mCRPC-5C-6
Baseline	PSA	105.1	35.9	256.7	330.7	114.7	307.5	293.95	29.4	22.5
	Tumor	67	29	114	113	46	24	NA	NA	NA
Best Response	PSA	137	51.8	8.09	479.1	41.73	19.66	583.44	1	0.29
	Tumor	80	23	45	123	41	15	NA	NA	NA
% change from Baseline	PSA	30.35	44.29	-96.85	44.87	-63.62	-93.61	98.48	-96.6	-98.71
	Tumor	19.4	-20.7	-60.5	8.8	-10.9	-37.5	NA	NA	NA

## Sheet: Fig1B
Days from BPX-601 infusion	mCRPC-5B-1	mCRPC-5B-2	mCRPC-5B-3	mCRPC-5C-1	mCRPC-5C-2	mCRPC-5C-3	mCRPC-5C-5	mCRPC-5C-4	mCRPC-5C-6
-7	0
29	30.35
57	56.04
-8		0
52		44.29
-14			0
-6			5.38
0			-22.05
3			-30.58
7			-20.34
10			-52.55
14			-80.43
22			-96.08
29			-96.85
37			-94.68
-9				0
0				-3.84
14				44.87
27				82.25
36				165.2
-13					0
-1					20.23
0					13.34
1					1.74
2					8.2
3					8.98
4					12.64
5					15.61
6					6.45
7					2.44
9					-14.11
10					-29.86
11					-28
12					-18.68
13					-32.47
14					-37.7
15					-41.54
16					-44.29
17					-47.31
22					-53.35
29					-61.77
36					-63.62
-15						0
-1						-10.76
6						-33.76
9						-67.94
13						-87.04
15						-90.6
17						-92.91
18						-93.61
19						-93.04
-10							0
28							-96.26
57							-96.6
-8								0
37								106.94
-12									0
8									-62.22
10									-78.84
13									-91.38
15									-94.8
17									-96.44
21									-98.71

## Sheet: Fig2A
Days from BPX-601 infusion	mPDAC-5B-1	mPDAC-5B-2	mPDAC-5B-3	mPDAC-5B-4	mPDAC-5B-5	mPDAC-5C-1	mPDAC-5C-2	mPDAC-5C-3	mPDAC-5C-4	mPDAC-5C-5	mPDAC-5C-6
-7	16	16	16	24		16	132.782	37.3832	27.1647	16	10
0	16	16	16	24	16	16	16	61.7761	45.0574	16.0481	10
0.042	1829.22	1770.02	2581.99	1358.15	2435.39	408.899	213.691	1304.31	251.73	1247.24	11428.2
0.17	576.244	893.355	916.111	1550.74	3683.18	394.588	142.554	939.866	633.208	1137.73	285.96
1	1898.45	1834.5	3844.76	1361.8	256.508	220.785	64.6647	1537.84	992.328	6525.49	263.3
2	27710.3		7999.13	6620.17	824.962	750.843	337.186	6904.57	4465.12	12736.9	1741.03
4		39649		13724.5	1900.55	2236.07		46994.2	8456.41	32660.2	9063.58
7	23227.5	52900.8	4816.43	5646.79	9886.2	1992.48	644.848	26214.9	41469.6	8799.25	2051.24
14	12611.5	1390.47	1496.06	16941	3638.51	743.433	823.939	3600.93	15604.8	11735.3
21	2910.68	295.079	858.033	14588.3	657.631	1344.13	45.0857	159.716	1913.9
28	5629.55	132.952	360.135	928.572	399.078	16	16	279.296	168.042
35	3067.34	16	2087.2		165.814		16	641.355	469.529
42		16	451.337	1106.19			16		113
49							16		16
56							16
63							16
70							16
77							16
84	511.14	16	32
111	463.138	16
139	199.884	16
167	210.094	32
251	718.708	718.708

## Sheet: Fig2B
Days from BPX-601 infusion	mCRPC-5B-1	mCRPC-5B-2	mCRPC-5B-3	mCRPC-5C-1	mCRPC-5C-2	mCRPC-5C-3	mCRPC-5C-4	mCRPC-5C-5	mCRPC-5C-6
-7	10			10		10	10	10	10
0		10	10	10			10	10	10
0.042		10	4813.28			22287.5	15962.2	13132.1	3355.42
0.17		10	10	2907.47	10	5813.17	3707.19	382.295	2324.01
1	541.89	750.62	10	731.834			713.62	577.656	2803.29
2	1794.65	2403.24	1181.9	2756.13			568.95	3143.55	3610.8
4	5373.97					6349.57	507.56	5085.27	5940.37
7	2574.35	2350.19	5700.03	33326.4	2471.01	14167.4	21259.3	49647.5
14	7766.75	3523.79		2777.3	1454.45		1875.42	5213.95	74481.3
15						593318
21				1110.52	175.29		8290.97	1039.41	18764.9
28	1212.27		255.43	1269.37	267.32			921.282
35	10		317.316				4131.94	135.73
42	10		149.15		329.12		3169.76	63.3853
49					213.6		4360.73	10
56					247.22		4722.73	118.98
63			121.636		257.578		5144.05	10
70					277.054		4820.04	10
77					122.805		6420.61
84					10		1940.26
91					10
98					246.955
105			10		192.139			10
112					134.49
119					119.051			10
126					80.4533
133					182.153			10
140					160.234			10
147								10
154					10			10
161					184.171			10
168					163.952			10
175					193.307			10
182					149.433			10
189					90.4391
196					56.7281
203					10
210					10
217					97.0963
224					10
231					57.8966
238					10
245					10
252					10
259
266					10
273					10
280
287					10
294					10
301
308					10
315					10
322					10
329					10
336					10

## Sheet: Fig2C
	VCN											RimPK											IFNg
Relative days from BPX-601 infusion	mPDAC-5B-1	mPDAC-5B-2	mPDAC-5B-3	mPDAC-5B-4	mPDAC-5B-5	mPDAC-5C-3	mPDAC-5C-4	mPDAC-5C-5	mPDAC-5C-1	mPDAC-5C-2	mPDAC-5C-6	mPDAC-5B-1	mPDAC-5B-2	mPDAC-5B-3	mPDAC-5B-4	mPDAC-5B-5	mPDAC-5C-3	mPDAC-5C-4	mPDAC-5C-5	mPDAC-5C-1	mPDAC-5C-2	mPDAC-5C-6	mPDAC-5B-1	mPDAC-5B-2	mPDAC-5B-3	mPDAC-5B-4	mPDAC-5B-5	mPDAC-5C-3	mPDAC-5C-4	mPDAC-5C-5	mPDAC-5C-1	mPDAC-5C-2	mPDAC-5C-6
-7	16	16	16	24		37.3832	27.1647	16	16	132.782	10												6.49451	2.05713	2.14895	2.97775			3.62218	1.6	5.84213	1.6	1.6
0	16	16	16	24	16	61.7761	45.0574	16.0481	16	16	10												8.48276	3.34845	3.58638	1.30993	19.4069	1.17723	2.57922	1.6	6.69096	1.6	1.6
0.042	1829.22	1770.02	2581.99	1358.15	2435.39	1304.31	251.73	1247.24	408.899	213.691	11428.2												9.14595	2.83263	3.3491	2.98401	16.8947	1.67672	2.27712		7.64834	1.6	1.6
0.17	576.244	893.355	916.111	1550.74	3683.18	939.866	633.208	1137.73	394.588	142.554	285.96
1	1898.45	1834.5	3844.76	1361.8	256.508	1537.84	992.328	6525.49	220.785	64.6647	263.3												9.67901	6.49342	1.19429	2.70496	17.1471	3.59251	5.57782	0.731278	8.71436	0.193858	3.68
2	27710.3		7999.13	6620.17	824.962	6904.57	4465.12	12736.9	750.843	337.186	1741.03												8.34774		2.62401	3.53497	4.55435	4.53281	13.8883	1.6	8.92803	1.6	3.88
4		39649		13724.5	1900.55	46994.2	8456.41	32660.2	2236.07		9063.58													7.02204		4.89342			22.0435	1.6	8.18211		3.34
7	23227.5	52900.8	4816.43	5646.79	9886.2	26214.9	41469.6	8799.25	1992.48	644.848	2051.24	0.5	0.5	0.5	0.5	0.5	0.5	0.5	0.5	0.5	0.5	0.5	6.62617	2.83021	3.10362	2.70955	15.8961	0.434312	4.51427	1.6	5.42096	1.6	5.99
7.042	7957.31	25760.4	2266.56	2835.43	10845.4	10805.2	26173.7	9538.21	570.431	322.935	672.33	530	421	329	532	597	323	156	217	273	659	1410	7.68482	2.57295	6.50286	2.98604		0.686953	6.43201	1.6	7.11612	1.6	4.69
7.084												267	218	319	225	471	365	371	194	96.4	666	417
7.17	4649.47	8715.92	903.248	1499.4	4787.67	2749.99	12117.9	898.889	430.306	183.772	316.63	21.3	23.2	34.1	30.1	77.4	36.5	20.6	16.4	12.3	56	119
7.336	5240.07	29097.3	793.944	776.354	2578.33	1132.36	12063.2	646.947	603.149	240.951	267.5	12.8					16.5	4.46				51.6
8	18836.3	26241.6	1959.69	13856.2	4212.81	7839.79	20674.8	281.615	972.316	1459.68	150.07	0.5	0.5	1.02	0.5	6.19	1.81	0.5	0.5	0.5	3.23	10	8.61367	5.96589	41.412	147.199	17.1438	9.39487	111.125	22.6497	6.69155	1.6	179.3
10											11202.6												6.62564	3.09324	4.07918	9.68023	29.2151	3.2354	5.2369	10.4347	5.63283	1.6	185.37
14	12611.5	1390.47	1496.06	16941	3638.51	3600.93	15604.8	11735.3	743.433	823.939													6.49342	4.12936	4.06914	2.95878	20.4007	1.67672	4.17742	2.821	7.54202	1.6	251.37

## Sheet: Fig2D
	VCN									RimPK									IFNg
Relative days from BPX-601 infusion	mCRPC-5B-1	mCRPC-5B-2	mCRPC-5B-3	mCRPC-5C-1	mCRPC-5C-2	mCRPC-5C-3	mCRPC-5C-5	mCRPC-5C-4	mCRPC-5C-6	mCRPC-5B-1	mCRPC-5B-2	mCRPC-5B-3	mCRPC-5C-1	mCRPC-5C-2	mCRPC-5C-3	mCRPC-5C-5	mCRPC-5C-4	mCRPC-5C-6	mCRPC-5B-1	mCRPC-5B-2	mCRPC-5B-3	mCRPC-5C-1	mCRPC-5C-2	mCRPC-5C-3	mCRPC-5C-5	mCRPC-5C-4	mCRPC-5C-6
-7	10			10		10	10	10	10										1.6	5.39	8.52	5.88	7.6	4.42	1.6	43.1	1.6
0		10	10				10	10	10											5.63	1.6	1.6	11.5	4.42	1.6	24.6	1.6
0.042		10	4678.55			23783.2	13773.6	16867.8	3084.67											7.11	5.78	6.29	20.5	4.42	4.06	23	1.6
0.17		10	10	2594.93	10	5771.74	10	3469.26	1957.03											9.17	19	6.01	29.5	3.99	11.1	23.9	1.6
1	541.89	750.62	10	216.299			47.7352	713.62	2481.03										8.52	24.9	122	8.59	15.7	44.7	1.6	27.1	14.3
2	1794.65	2403.24	708.362	2429.46			2853.04	568.95	3363.88										1.6	19.1	102	6.15	26.5	44.6	1.6	34.8	163
4	5373.97					6358.19	4975.92	507.56	5910.8										1.6	24.3	173	3.71	40.3	517	1.6	32.4	458
7	2574.35	2350.19	5648.05	35852	2471.01	14905.4	53695.9	22659		0.5	0.5	0.5	0.5	0.5	0.5	0.5	0.5		1.6	7.87	114	7.13	1.6	208	1.6	29.8
7.042	449.02	658.98	2187.96	12575		3031.67	19145.6			158	307	148	451	267	363	381	372		1.6	11.3	108	4.44	5.5	334	4.16	28.1
7.084										343	72.9	290	663	295	164	379	464
7.17	331.02		2096.59	7130.78	574.08	2953.5	6527.68	7445.99		17.2	6.99	42	38.5	45.2	41.6	38.3	32.1		23.7	193	797	13.3	150.4	1103	43.8	123
7.336										4.08	5.29	8.74	248	11	12	11.2	10.4
8	10		67.9055	7343.28	207.26	2440.19	8552.96	14926.5		0.5	0.5	1.85	1.98	1.54	2.5	2.61			163	96.7	2679	9.8	383	8027	293	10.8
10	9626.62		1184.24	2902.17	730.49	2113.55	11275.1	13567.2											1.6		407	5.48	14.1	2339	1.6	8.7
14	3523.79	3523.79	18628.3	2452.61	1454.45		5116.61	1466.59											1.6	6.11		39.1	9.1		1.6	1.6

## Sheet: Fig2E
Cytokine	Subject	BASELINE	M1D0 PRE	M1D7 PRE	MAX VALUE D0-D7P	M1D14 PRE	MAX VALUE D7-D14P	M1D21 PRE	MAX VALUE D14-D21P	M1D28 PRE	MAX VALUE D21-D28P		FC BASELINE	FC M1D0 PRE	FC MAX VALUE D0-D7P	FC M1D7 PRE	FC MAX VALUE D7-D14P	FC M1D14 PRE	FC MAX VALUE D14-D21P	FC M1D21 PRE	FC MAX VALUE D21-D28P	FC M1D28 PRE
IFNy	mPDAC-5B-1	6.49451	8.48276	6.62617	9.67901	6.49342	8.61367						0.765612	1	1.14102	0.781134	1.01543	0.765484
IFNy	mPDAC-5B-2	2.05713	3.34845	2.83021	7.02204	4.12936	5.96589						0.614353	1	2.0971	0.84523	1.78169	1.23322
IFNy	mPDAC-5B-3	2.14895	3.58638	3.10362	3.3491	4.06914	41.412						0.599198	1	0.93384	0.86539	11.547	1.13461
IFNy	mPDAC-5B-4	2.97775	1.30993	2.70955	4.89342	2.95878	147.199						2.27321	1	3.73563	2.06847	112.371	2.25873
IFNy	mPDAC-5B-5		19.4069		17.1471	20.4007	29.2151							1	0.883556		1.5054	1.05121
IFNy	mPDAC-5C-1	5.84213	6.69096	5.42096	8.92803	7.54202	7.54202	6.05352	14.2854	6.05611	6.05611		0.873138	1	1.33434	0.810192	1.1272	1.1272	2.13503	0.904732	0.905118	0.905118
IFNy	mPDAC-5C-2	1.6	1.6	1.6	1.6	1.6	1.6	1.6	1.6		1.6		1	1	1	1	1	1	1	1	1
IFNy	mPDAC-5C-3		1.17723	0.434312	4.53281	1.67672	9.39487		2.9989	0.939594	0.939594			1	3.8504	0.368927	7.98049	1.42429	2.54742		0.79814	0.79814
IFNy	mPDAC-5C-4	3.62218	2.57922	4.51427	22.0435	4.17742	111.125	2.8435	11.6968		11.7251		1.40437	1	8.54658	1.75025	43.0849	1.61965	4.53502	1.10247	4.54598
IFNy	mPDAC-5C-5	1.6	1.6	1.6	1.6	2.821	22.6497		2007.1				1	1	1	1	14.156	1.76313	1254.44
IFNy	mPDAC-5C-6	1.6	1.6	5.99	5.99		251.37						1	1	3.74375	3.74375	157.106
IFNy	Median	2.61109	1.6	1.6	4.53281	2.821	9.39487	2.8435	11.6968	3.49785	3.82805		1	1	1.33434	0.932695	7.98049	1.18391	2.54742	1	0.952559	0.851629
IP-10	mPDAC-5B-1	153.803	244.024	443.91	443.91	283.994	1376.09						0.630276	1	1.81912	1.81912	5.63915	1.16379
IP-10	mPDAC-5B-2	362.78	489.867	1380.41	2734.78	626.734	3926.16						0.740568	1	5.58271	2.81793	8.01475	1.2794
IP-10	mPDAC-5B-3	395.352	1112.78	1631.62	1631.62	510.146	7150.9						0.355282	1	1.46625	1.46625	6.42614	0.458441
IP-10	mPDAC-5B-4	217.726	293.02	992.326	992.326	2804.88	4463.66						0.74304	1	3.38654	3.38654	15.2333	9.57232
IP-10	mPDAC-5B-5		1502.29	1203.64	3922.91	3237.37	16977.5							1	2.61129	0.801203	11.3011	2.15496
IP-10	mPDAC-5C-1	846.973	950.739	1242.86	1287.15	1396.08	1396.08	1654.34	2734.22	1344.54	1344.54		0.890857	1	1.35385	1.30725	1.46842	1.46842	2.87589	1.74006	1.4142	1.4142
IP-10	mPDAC-5C-2	379.79	408.192	422.356	576.286	562.831	662.499	802.922	1023.95	732.285	852.812		0.93042	1	1.4118	1.0347	1.62301	1.37884	2.50849	1.96702	2.08924	1.79397
IP-10	mPDAC-5C-3	354.907	560.351	452.397	817.408	1266.1	1486.06	639.642	2215.41	605.439	605.439		0.633365	1	1.45874	0.807346	2.65201	2.25948	3.95361	1.1415	1.08046	1.08046
IP-10	mPDAC-5C-4	395.336	910.338	2961.07	3929.68	2907.15	13454.9	1088.08	11510.3	584.766	2194.76		0.434274	1	4.31673	3.25272	14.7802	3.19349	12.6439	1.19525	2.41093	0.642361
IP-10	mPDAC-5C-5	611.041	1089.77	628.834	1041.91	2323.81	7269.67		16145				0.560706	1	0.956083	0.577033	6.67083	2.13238	14.8151
IP-10	mPDAC-5C-6	290.01	553.1	3568	3568		3553						0.524336	1	6.45091	6.45091	6.42379
IP-10	Median	395.336	910.338	628.834	1041.91	1396.08	1486.06	945.5	2734.22	668.862	1098.68		0.631821	1	1.81912	1.46625	6.42614	1.8004	3.95361	1.46765	1.75172	1.24733
IL-6	mPDAC-5B-1	9.2071	7.81952	6.87486	8.90805	7.49431	16.5396						1.17745	1	1.13921	0.879192	2.11517	0.95841
IL-6	mPDAC-5B-2	1.6		5.06535	90.786		4.50491
IL-6	mPDAC-5B-3	5.54818	10.3382	26.6764	26.6764	7.78004	61.2703						0.536666	1	2.58036	2.58036	5.92657	0.75255
IL-6	mPDAC-5B-4	0.868968	0.381941	4.54638	7.85227	175.158	429.921						2.27514	1	20.5589	11.9034	1125.62	458.599
IL-6	mPDAC-5B-5		38.442	27.7908	40.8714	42.5468	96.4237							1	1.0632	0.722929	2.50829	1.10678
IL-6	mPDAC-5C-1	29.5103	25.719	21.9305	22.3328	23.0925	24.7242	23.45	26.0879	25.8196	25.8196		1.14741	1	0.868339	0.852697	0.961321	0.897879	1.01434	0.911779	1.00391	1.00391
IL-6	mPDAC-5C-2	3.64785	4.5111	2.10995	6.65954	5.61901	5.61901	5.57333	6.3818	7.55161	7.55161		0.80864	1	1.47626	0.467725	1.2456	1.2456	1.41469	1.23547	1.67401	1.67401
IL-6	mPDAC-5C-3	56.4178	74.2043	77.7864	77.7864	94.1122	118.589	79.7656	94.5156	64.5541	64.5541		0.760304	1	1.04827	1.04827	1.59814	1.26828	1.27372	1.07494	0.86995	0.86995
IL-6	mPDAC-5C-4	2.59745	1.18285	3.26508	15.108	0.299048	7.68626	1.6	1.6136	0.595972	0.595972		2.19592	1	12.7725	2.76035	6.49808	0.25282	1.36417	1.35266	0.503844	0.503844
IL-6	mPDAC-5C-5	1.6	3.79732	11.8845	11.8845	18.1992	250.565		871.832				0.42135	1	3.12971	3.12971	65.9847	4.79265	229.592
IL-6	mPDAC-5C-6	25.44	53	69.84	108.45		77.92						0.48	1	2.04623	1.31774	1.47019
IL-6	Median	3.64785	4.5111	11.8845	15.108	18.1992	24.7242	14.5117	26.0879	16.6856	16.6856		0.80864	1	1.76124	1.183	2.31173	1.10678	1.36417	1.15521	0.936931	0.936931
GM-CSF	mPDAC-5B-1	2.90801	4.88779	1.74503	5.88789	0.979275	7.29861						0.594954	1	1.20461	0.357018	1.49323	0.200352
GM-CSF	mPDAC-5B-2	0.79064	5.08671	2.71206	14.267	6.08845	8.61998						0.155433	1	2.80477	0.533167	1.69461	1.19693
GM-CSF	mPDAC-5B-3	10.3126	16.8354	22.9826	22.9826	12.978	56.3288						0.612552	1	1.36513	1.36513	3.34585	0.770876
GM-CSF	mPDAC-5B-4	3.00692	5.03668	4.33299	8.10087	3.75366	31.1978						0.597004	1	1.60837	0.860287	6.19412	0.745264
GM-CSF	mPDAC-5B-5		42.9837		57.8739	41.2856	58.9648							1	1.34642		1.37179	0.960495
GM-CSF	mPDAC-5C-1	7.7411	9.61364	7.39763	11.0025	8.21793	9.38814	9.38877	10.5451	11.9213	11.9213		0.80522	1	1.14447	0.769492	0.976543	0.85482	1.09689	0.976609	1.24004	1.24004
GM-CSF	mPDAC-5C-2	2.59782	3.77933	1.6	4.99608		2.16788				1.71508		0.687377	1	1.32195	0.423356	0.573615				0.453804
GM-CSF	mPDAC-5C-3	1.6	5.70489	2.40645	7.46991	1.79032	20.0053	2.8236	4.30091	3.24896	3.24896		0.280461	1	1.30939	0.421822	3.50669	0.313822	0.753898	0.494943	0.569504	0.569504
GM-CSF	mPDAC-5C-4		1.05669	1.44841	9.0756		12.1154	1.6	7.85894	1.6	1.6			1	8.58872	1.3707	11.4654		7.43733	1.51416	1.51416	1.51416
GM-CSF	mPDAC-5C-5		2.19288		9.65786	1.6	72.3467		563.984					1	4.40419		32.9916	0.729634	257.189
GM-CSF	mPDAC-5C-6	1.6	3.23	4.52	8.9		113.46						0.495356	1	2.75542	1.39938	35.1269
GM-CSF	Median	2.59782	3.77933	2.00323	9.0756	1.79032	12.1154	2.8236	9.20201	3.24896	2.48202		0.595979	1	1.36513	0.769492	3.34585	0.75807	4.26711	0.976609	0.904771	1.24004
TNF-a	mPDAC-5B-1	15.3347	9.61678	11.8051	11.8051	10.8493	21.0006						1.59458	1	1.22755	1.22755	2.18375	1.12816
TNF-a	mPDAC-5B-2	14.5243	15.8769	18.7806	26.8957	16.0807	26.4938						0.91481	1	1.69401	1.18289	1.6687	1.01284
TNF-a	mPDAC-5B-3	25.0469	31.8636	33.0669	39.3308	24.8027	44.8325						0.786067	1	1.23435	1.03776	1.40701	0.778402
TNF-a	mPDAC-5B-4	19.7941	10.6391	18.0431	18.0431	23.4545	41.7607						1.86051	1	1.69592	1.69592	3.9252	2.20455
TNF-a	mPDAC-5B-5		15.0947		17.9642	21.7283	26.2726							1	1.1901		1.74051	1.43946
TNF-a	mPDAC-5C-1	17.6518	13.8855	11.7249	17.1145	10.8581	18.1883	11.94	12.5893	11.9408	11.9408		1.27124	1	1.23254	0.844401	1.30987	0.781976	0.906647	0.859889	0.859945	0.859945
TNF-a	mPDAC-5C-2	6.036	2.18773	1.6	3.9857	2.7405	4.67226	5.14557		3.24328	6.47353		2.75903	1	1.82185	0.731353	2.13567	1.25267		2.35202	2.95902	1.48249
TNF-a	mPDAC-5C-3	13.3965	7.18704	7.18785	8.32307	10.1332	16.6443	15.9781	15.9781	9.67725	9.67725		1.86398	1	1.15807	1.00011	2.31588	1.40992	2.22318	2.22318	1.34649	1.34649
TNF-a	mPDAC-5C-4	11.6451	7.79971	18.7596	24.2445	20.7428	31.5996	7.56667	21.5598	10.1299	11.9948		1.49301	1	3.10838	2.40517	4.05138	2.65943	2.76417	0.970122	1.53785	1.29875
TNF-a	mPDAC-5C-5	24.7455	13.8903	16.225	17.9392	26.9562	43.4569		152.08				1.7815	1	1.29149	1.16808	3.12858	1.94065	10.9487
TNF-a	mPDAC-5C-6	19.01	13.18	33.04	33.04		62.4						1.44234	1	2.50683	2.50683	4.73445
TNF-a	Median	13.3965	7.79971	11.7249	17.1145	10.8581	18.1883	9.75334	18.7689	9.90355	10.809		1.54379	1	1.29149	1.17549	2.18375	1.3313	2.49368	1.59665	1.44217	1.32262
MIP-1b	mPDAC-5B-1	16.3024	21.4269	10.0421	24.7347	4.69661	28.649						0.760839	1	1.15437	0.468669	1.33705	0.219192
MIP-1b	mPDAC-5B-2	27.9838	58.9608	29.4364	96.3033	45.3808	45.3808						0.474617	1	1.63334	0.499254	0.769678	0.769678
MIP-1b	mPDAC-5B-3	69.2902	71.5207	62.061	78.5475	44.8468	83.9914						0.968814	1	1.09825	0.867736	1.17437	0.627046
MIP-1b	mPDAC-5B-4	44.3697	52.7667	39.1216	61.3294	40.1938	85.6632						0.840865	1	1.16227	0.741407	1.62343	0.761727
MIP-1b	mPDAC-5B-5		71.5547		67.5266	60.4508	66.9456							1	0.943706		0.935586	0.84482
MIP-1b	mPDAC-5C-1	41.0053	65.3083	36.3846	66.7942	39.6646	52.782	40.2412	41.7556	36.3694	36.3694		0.627872	1	1.02275	0.557121	0.808197	0.607343	0.63936	0.616172	0.556887	0.556887
MIP-1b	mPDAC-5C-2	69.8194	140.792	36.4126	136.911	36.459	114.422	44.751		52.1506	52.1506		0.495904	1	0.972431	0.258627	0.8127	0.258956		0.317852	0.370409	0.370409
MIP-1b	mPDAC-5C-3	29.5424	34.5207	27.8395	44.406	23.1963	172.111	29.8635	29.8635	25.6813	25.6813		0.855787	1	1.28636	0.806458	4.98574	0.671954	0.865091	0.865091	0.74394	0.74394
MIP-1b	mPDAC-5C-4	53.1378	72.4102	73.1215	122.388	61.9909	108.794	29.8695	79.6831	36.2364	49.6277		0.733844	1	1.69021	1.00982	1.50247	0.856108	1.10044	0.412504	0.685369	0.500432
MIP-1b	mPDAC-5C-5	99.3421	91.9901	85.9883	104.217	95.1474	152.543		201.323				1.07992	1	1.13292	0.934756	1.65825	1.03432	2.18853
MIP-1b	mPDAC-5C-6	61.69	68.57	77.85	97.04		111.97						0.899665	1	1.4152	1.13534	1.63293
MIP-1b	Median	53.1378	72.4102	36.4126	104.217	39.6646	114.422	35.0554	60.7193	36.3029	42.9986		0.800852	1	1.15437	0.773933	1.33705	0.716841	0.982766	0.514338	0.621128	0.528659

## Sheet: Fig2F
Cytokine	Subject	BASE	M1D0 PRE	M1D7 PRE	MAX VALUE D0-D7P	M1D14 PRE	MAX VALUE D7-D14P	M1D21 PRE	MAX VALUE D14-D21P	M1D28 PRE	MAX VALUE D21-D28P		FC BASE	FC M1D0 PRE	FC MAX VALUE D0-D7P	FC M1D7 PRE	FC MAX VALUE D7-D14P	FC M1D14 PRE	FC MAX VALUE D14-D21P	FC M1D21 PRE	FC MAX VALUE D21-D28P	FC M1D28 PRE
IFNy	mCRPC-5B-1	1.6	1.6	3.88	8.52	1.6	163						1	1	5.325	2.425	101.875	1
IFNy	mCRPC-5B-2	5.39	5.63	7.87	24.9	6.11	193						0.957371	1	4.42274	1.39787	34.2806	1.08526
IFNy	mCRPC-5B-3	8.52	1.6	114	173	36.1	2679						5.325	1	108.125	71.25	1674.38	22.5625
IFNy	mCRPC-5C-1	5.88	1.6	7.13	8.59	39.1	39.1	26.4	28.2	-	41.3		3.675	1	5.36875	4.45625	24.4375	24.4375	17.625	16.5	25.8125
IFNy	mCRPC-5C-2	8.4	11.45	1.6	40.3	9.12	383	52.2	52.2	17.5	62.2		0.733624	1	3.51965	0.139738	33.4498	0.796507	4.55895	4.55895	5.43231	1.52838
IFNy	mCRPC-5C-3	4.42	4.42	208	517	-	8027	-	1887	-			1	1	116.968	47.0588	1816.06		426.923
IFNy	mCRPC-5C-4	43.083	24.6	29.8	34.8	1.6	123.28	20.9	166	-	39.3		1.75134	1	1.41463	1.21138	5.0114	0.0650407	6.74797	0.849593	1.59756
IFNy	mCRPC-5C-5	1.6	1.6	1.6	11.0761	1.6	293.481	17.7	17.7	1.6	93.6		1	1	6.92259	1	183.426	1	11.0625	11.0625	58.5	1
IFNy	mCRPC-5C-6	1.6	1.6	0.6	458	245	329	493	3298	-			1	1	286.25	0.375	205.625	153.125	2061.25	308.125
IFNy	Median	5.88	4.42	7.13	34.8	5.36	293.481	23.65	52.2	9.55	51.75		1	1	5.36875	1.39787	101.875	1.04263	14.3438	11.0625	15.6224	1.26419
IP-10	mCRPC-5B-1	1116	1116	1440	2653	1251	7110						1	1	2.37724	1.29032	6.37097	1.12097
IP-10	mCRPC-5B-2	423	578	3134	3134	1044	8426						0.731834	1	5.42215	5.42215	14.5779	1.80623
IP-10	mCRPC-5B-3	1125	517	8810	8810	954	73200						2.17602	1	17.0406	17.0406	141.586	1.84526
IP-10	mCRPC-5C-1	972	699	784	1037	2309	2309	2058	3722	-	2309		1.39056	1	1.48355	1.1216	3.30329	3.30329	5.32475	2.94421	3.30329
IP-10	mCRPC-5C-2	457	841	1093	3059	1109	6140	667	2461	1569	1569		0.543401	1	3.63734	1.29964	7.30083	1.31867	2.92628	0.793103	1.86564	1.86564
IP-10	mCRPC-5C-3	1265	1042	28280	34180	-	168340	-	57420	-			1.21401	1	32.8023	27.1401	161.555		55.1056
IP-10	mCRPC-5C-4	471	710	915.709	915.709	1512.17	2200.65	2783.61	4881.7	-	3150.84		0.66338	1	1.28973	1.28973	3.09951	2.12982	6.87563	3.92058	4.43781
IP-10	mCRPC-5C-5	461	579	1759.75	1759.75	1335.94	7444.75	1211.69	4118.09	1161	2686.49		0.7962	1	3.03929	3.03929	12.8579	2.30732	7.11243	2.09272	4.63988	2.00518
IP-10	mCRPC-5C-6	506	408	1571	12931	24855	24855	11835	222765	-			1.2402	1	31.6936	3.85049	60.9191	60.9191	545.993	29.0074	0
IP-10	Median	506	699	1571	3059	1293.47	7444.75	2058	4499.9	1365	2497.75		1	1	3.63734	3.03929	12.8579	1.98754	6.99403	2.94421	3.30329	1.93541
IL-6	mCRPC-5B-1	1.6	1.6	1.6	1.6	4.41	19.4						1	1	1	1	12.125	2.75625
IL-6	mCRPC-5B-2	20.8	5.2	5.79	14.3	29.1	29.1						4	1	2.75	1.11346	5.59615	5.59615
IL-6	mCRPC-5B-3	4.69	3.67	767	1902	38.4	2911						1.27793	1	518.256	208.992	793.188	10.4632
IL-6	mCRPC-5C-1	5.45	1.6	6.37	6.37	24.2	24.2	12.1	32.7	-	10.2		3.40625	1	3.98125	3.98125	15.125	15.125	20.4375	7.5625	6.375
IL-6	mCRPC-5C-2	1.6	1.6	2.725	51.7	29.5	36.4	13.9	33.2	11.8	19.2		1	1	32.3125	1.70312	22.75	18.4375	20.75	8.6875	12	7.375
IL-6	mCRPC-5C-3	18.9	1.6	3045	4589	-	5598.8		2603	-			11.8125	1	2868.12	1903.12	3499.25		1626.88
IL-6	mCRPC-5C-4	1.6	1.6	1.6	1.6	4.29	16.9	1.6	12	-	1.6		1	1	1	1	10.5625	2.68125	7.5	1	1
IL-6	mCRPC-5C-5	1.6	1.6	1.6	1.6	1.6	28.8831	1.6	1.6	1.6	1.6		1	1	1	1	18.0519	1	1	1	1	1
IL-6	mCRPC-5C-6	1.6	1.6	177	2252	532	760	22702	22702	-			1	1	1407.5	110.625	475	332.5	14188.8	14188.8
IL-6	Median	1.6	1.6	5.79	14.3	26.65	29.1	12.1	32.95	6.7	5.9		1	1	3.98125	1.70312	18.0519	8.02968	20.5938	7.5625	3.6875	4.1875
GM-CSF	mCRPC-5B-1	1.6	1.6	1.6	1.6	1.6	14.1						1	1	1	1	8.8125	1
GM-CSF	mCRPC-5B-2	1.6	1.6	1.6	1.6	1.6	1.6						1	1	1	1	1	1
GM-CSF	mCRPC-5B-3	1.6	1.6	5.35	36.9	1.6	216						1	1	23.0625	3.34375	135	1
GM-CSF	mCRPC-5C-1	1.6	1.6	1.6	1.6	1.6	5.91	1.6	5.53	-	1.6		1	1	1	1	3.69375	1	3.45625	1	1
GM-CSF	mCRPC-5C-2	2.435	3.215	2.435	5.9	1.6	18	3.015	4.02	1.6	4.33		0.757387	1	1.83515	0.757387	5.59876	0.497667	1.25039	0.937792	1.34681	0.497667
GM-CSF	mCRPC-5C-3	1.6	1.6	8.2	28.3	-	1242	-	315	-			1	1	17.6875	5.125	776.25		196.875
GM-CSF	mCRPC-5C-4	13.7	5.17	7.28	9.63	5.35	26.3	6.46	13.2	-	5.17		2.6499	1	1.86267	1.40812	5.08704	1.03482	2.55319	1.24952	1
GM-CSF	mCRPC-5C-5	1.6	1.6	1.6	1.6	1.6	22.3	1.6	1.6	1.6	1.6		1	1	1	1	13.9375	1	1	1	1	1
GM-CSF	mCRPC-5C-6	1.6	1.6	1.6	37.9	1.6	103.6	60.1	101.6	-			1	1	23.6875	1	64.75	1	63.5	37.5625
GM-CSF	Median	1.6	1.6	1.6	5.9	1.6	22.3	3.015	9.365	1.6	2.965		1	1	1.83515	1	8.8125	1	3.00472	1	1	0.748834
TNFa	mCRPC-5B-1	11.7	11.7	12.6	15	25.9	25.9						1	1	1.28205	1.07692	2.21368	2.21368
TNFa	mCRPC-5B-2	14.2	9.47	19.8	19.8	12.8	49.5						1.49947	1	2.09081	2.09081	5.22703	1.35164
TNFa	mCRPC-5B-3	20.6	9.3	62.8	75.5	17.1	102						2.21505	1	8.11828	6.75269	10.9677	1.83871
TNFa	mCRPC-5C-1	21.5	5.04	10.9	12.6	40.9	40.9	45.3	46	-	43.3		4.26587	1	2.5	2.1627	8.11508	8.11508	9.12698	8.9881	8.59127
TNFa	mCRPC-5C-2	18.1	13.3	28.5	28.5	24.9	82.5	24	35.9	23.6	29.15		1.3609	1	2.14286	2.14286	6.20301	1.87218	2.69925	1.80451	2.19173	1.77444
TNFa	mCRPC-5C-3	86.26	23.57	211.27	211.27	-	369.05	-	161.38	-			3.65974	1	8.96351	8.96351	15.6576		6.84684
TNFa	mCRPC-5C-4	40.1108	25.7497	34.1768	34.1768	46.1702	61.8199	54	84.5	-	59.9		1.55772	1	1.32727	1.32727	2.40081	1.79304	3.2816	2.09712	2.32624
TNFa	mCRPC-5C-5	24.6141	21.8856	44.8351	44.8351	25.7368	102.623	43.8	54.66	35.8	89.3		1.12467	1	2.04861	2.04861	4.68905	1.17597	2.49753	2.00131	4.08031	1.63578
TNFa	mCRPC-5C-6	28.9	16	54.2	54.2	124	124	55.1	285	-			1.80625	1	3.3875		7.75		17.8125	3.44375
TNFa	Median	21.5	13.3	34.1768	34.1768	25.8184	82.5	45.3	69.58	29.7	51.6		1.55772	1	2.14286	2.11684	6.20301	1.83871	5.06422	2.09712	3.20327	1.70511
MIP-1b	mCRPC-5B-1	8	8	28.1	60.5	8	67.2						1	1	7.5625	3.5125	8.4	1
MIP-1b	mCRPC-5B-2	56.3	77.4	90.2	101	63.6	121						0.72739	1	1.30491	1.16537	1.56331	0.821705
MIP-1b	mCRPC-5B-3	53.8	65.5	145	308	71.8	296						0.821374	1	4.70229	2.21374	4.51908	1.09618
MIP-1b	mCRPC-5C-1	123	89	64.9	137	140	178	95.5	126	-	364		1.38202	1	1.53933	0.729213	2	1.57303	1.41573	1.07303	4.08989
MIP-1b	mCRPC-5C-2	96.2	107.5	92.3	216	180	623	114	359	105.2	541		0.894884	1	2.0093	0.858605	5.79535	1.67442	3.33953	1.06047	5.03256	0.978605
MIP-1b	mCRPC-5C-3	234.47	124.06	467.33	485.31	-	1501	-	176.29	-			1.88997	1	3.9119	3.76697	12.099		1.42101
MIP-1b	mCRPC-5C-4	115.965	184.269	162.85	187.803	218.179	508.279	158	471	-	265		0.629323	1	1.01918	0.883762	2.75835	1.18402	2.55604	0.85744	1.43811
MIP-1b	mCRPC-5C-5	174.401	287.072	315.333	350	187	889.62	191	299	167	617		0.607515	1	1.2192	1.09844	3.09894	0.651404	1.04155	0.665338	2.14928	0.581735
MIP-1b	mCRPC-5C-6	189	206	270	435	282	632	130	1081	-			0.917476	1	2.11165	1.31068	3.06796		5.24757	0.631068
MIP-1b	Median	115.965	107.5	145	216	160	508.279	130	329	136.1	452.5		0.894884	1	2.0093	1.16537	3.09894	1.09618	1.98852	0.85744	3.11959	0.78017

## Sheet: Fig3A
Dose	After BPX-601 cells												1st Rim dose						2nd Rim dose						3rd Rim dose
Patient	010-001	010-002	055-005	010-004	125-001	040-001	055-006	055-008	055-007	010-001	010-002	055-005	010-004	125-001	040-001	055-006	055-008	055-007	010-004	125-001	040-001	055-006	055-008	055-007	010-004	125-001	040-001	055-006	055-008	055-007
Gr	0	0	2	0	0	0	1	1	2	1	1	3	1	1	1	1	2	4	0	1	0	0	4		0	0	0	0
CRP	14.74	27.32	159.1	33.73	2.6	0.8	72.79	96.77	224.37	285	32.86	24.77	73.5	7.4	4.1	87.19	3.89	53.05	95.92	1.4	0.4	4.41	9.36		50.93	1.8	0.15	0.39
Ferritin	245	1100	1541	238	1003	260	179.4	736	3967	688	6016	3599	409	1362	538	507	909	58144	496	1904	170	215.3	9580		268	954	74	90
IFNg	8.52	24.9	114	8.59	34.8	11.1	40.3	458	517	163	193	2679	39.1	123	293	283	329	8027	28.2	166	17.7	52.2	329		41.3	39.3	93.6	62.2
TNFa	15	19.8	75.5	12.6	34.2	44.8	28.5	54.2	211	25.9	49.5	102	40.9	61.8	103	82.5	124	369	90.5	79.8	54.7	35.9	285		43.3	59.9	89.3	35.9
GM-CSF	1.6	1.6	36.9	1.6	9.63	1.6	5.67	37.9	28.3	14.1	1.6	216	5.91	26.3	22.3	18.05	103.6	1242	5.53	13.2	1.6	4.015	103.6		1.6	5.17	1.6	4.33
IL-1RA	8	8	87.89	8	8	25.7	103.6	39.6	263	8	108	97.8	233	108	154	259	333	10000	218	161	80.3	48.3	200000		150	152	87.2	39.75
IL-6	1.6	14.3	1985	6.37	1.6	1.6	51.75	2252	4589	19.4	16.8	2911	24.2	16.9	30.8	136.4	760	5599	32.7	12	1.6	33.2	22702		10.2	1.6	1.6	19.15
IL-8	11.8	40.8	465	7.96	36.6	37.3	14.4	120	385	38.8	100	432	19	71.3	108	13.5	104	581	13.6	13.4	16.5	4.23	283		10.5	11.7	14.6	1.6
IL-10	5.2	21.3	111	1.6	59.8	46.9	10.6	394	204	10.7	38.4	107	10.1	169	129	17.9	50.9	454	17.3	117	1.6	20.6	71.9		3.71	26.9	3.67	9.22
IL-15	28.7	31.5	116	47.5	91.4	44.5	70.1	120	182	29.8	30.8	158	30.9	55.8	59.6	123.5	64	307	19.3	23	16.9	10.2	643		3.26	9.29	6.39	4.02
IP-10	2653	3134	8810	1037	916	1760	3059	12931	34180	7110	8426	73200	2309	2201	7445	6140	24855	168340	3870	4882	4118	2461	222765		2309	3151	2686	1569
MCP-1	1059	1585	5677	3591	4668	4570	1717.5	4911	13757	974	908	20340	1523	4387	10418	1279	4971	59840	1159	1895	2394	616	4977		1201	895	4615	550
MIP-1b	60.5	101	308	137	188	350	216.5	435	485	67.2	121	296	178	508	890	622.5	632	604	126	471	299	358.5	1081		364	265	617	541

## Sheet: Fig3B
Patient	Dose	Grade	CRP	Ferritin	IFNg	TNFa	GM-CSF	IL-1Ra	IL-6	IL-8	IL-10	IP-10	MCP-1	MIP-1b
mCRPC-5B-1	Predose	NA	14.74	224
mCRPC-5B-2	Predose	NA	7.97		5.63	9.47	1.6	8	5.2	23	5.29	578	936	77.4
mCRPC-5B-3	Predose	NA	47.5	1541	1.6	9.3	1.6	8	3.67	90.1	1.6	517	2826	65.5
mCRPC-5C-1	Predose	NA	6.1	221	1.6	8.56	1.6	8	1.6	1.6	1.6	699	1964	89
mCRPC-5C-2	Predose	NA	0.99		11.5	17.45	1.6	19.2	1.6	1.6	1.6	841	704	107.5
mCRPC-5C-3	Predose	NA	7.85	2866	4.42	38.1	1.6	8	1.6	21.4	1.6	1042	2769	124
mCRPC-5C-5	Predose	NA	0.15		1.6	30.6	1.6	8	1.6	1.6	1.6	579	1518	287
mCRPC-5C-4	Predose	NA	2.6	1003	24.6	21.2	5.17	8	1.6	10.6	9.06	710	3899	184
mCRPC-5C-6	Predose	NA	6.56	468	1.6	19.2	1.6	8	1.6	1.6	1.6	408	1542	206
mCRPC-5B-1	Post BPX-601	0	14.74	245	8.52	15	1.6	8	1.6	11.8	5.2	2653	1059	60.5
mCRPC-5B-2	Post BPX-601	0	27.32	1100	24.9	19.8	1.6	8	14.3	40.8	21.3	3134	1585	101
mCRPC-5C-1	Post BPX-601	0	33.73	238	8.59	12.6	1.6	8	6.37	7.96	1.6	1037	3591	137
mCRPC-5C-4	Post BPX-601	0	2.6	1003	34.8	34.2	9.63	8	1.6	36.6	59.8	916	4668	188
mCRPC-5C-5	Post BPX-601	0	0.8	260	11.1	44.8	1.6	25.7	1.6	37.3	46.9	1760	4570	350
mCRPC-5C-1	Post 2nd Rim	0	95.92	496	28.2	90.5	5.53	218	32.7	13.6	17.3	3870	1159	126
mCRPC-5C-5	Post 2nd Rim	0	0.4	170	17.7	54.7	1.6	80.3	1.6	16.5	1.6	4118	2394	299
mCRPC-5C-2	Post 2nd Rim	0	4.41	215.3	52.2	35.9	4.015	48.3	33.2	4.23	20.6	2461	616	358.5
mCRPC-5C-1	Post 3rd Rim	0	50.93	268	41.3	43.3	1.6	150	10.2	10.5	3.71	2309	1201	364
mCRPC-5C-4	Post 3rd Rim	0	1.8	954	39.3	59.9	5.17	152	1.6	11.7	26.9	3151	895	265
mCRPC-5C-5	Post 3rd Rim	0	0.15	74	93.6	89.3	1.6	87.2	1.6	14.6	3.67	2686	4615	617
mCRPC-5C-2	Post 3rd Rim	0	0.39	90	62.2	35.9	4.33	39.75	19.15	1.6	9.22	1569	550	541
mCRPC-5C-2	Post BPX-601	1	72.79	179.4	40.3	28.5	5.67	103.6	51.75	14.4	10.6	3059	1717.5	216.5
mCRPC-5C-3	Post BPX-601	1	224.37	3967	517	211	28.3	263	4589	385	204	34180	13757	485
mCRPC-5B-1	Post 1st Rim	1	285	688	163	25.9	14.1	8	19.4	38.8	10.7	7110	974	67.2
mCRPC-5B-2	Post 1st Rim	1	32.86	6016	193	49.5	1.6	108	16.8	100	38.4	8426	908	121
mCRPC-5C-1	Post 1st Rim	1	73.5	409	39.1	40.9	5.91	233	24.2	19	10.1	2309	1523	178
mCRPC-5C-4	Post 1st Rim	1	7.4	1362	123	61.8	26.3	108	16.9	71.3	169	2201	4387	508
mCRPC-5C-5	Post 1st Rim	1	4.1	538	293	103	22.3	154	30.8	108	129	7445	10418	890
mCRPC-5C-2	Post 1st Rim	1	87.19	507	283	82.5	18.05	259	136.4	13.5	17.9	6140	1279	622.5
mCRPC-5C-4	Post 2nd Rim	1	1.4	1904	166	79.8	13.2	161	12	13.4	117	4882	1895	471
mCRPC-5B-3	Post BPX-601	2	159.1	1541	114	75.5	36.9	87.89	1985	465	111	8810	5677	308
mCRPC-5C-6	Post BPX-601	2	96.77	736	458	54.2	37.9	39.6	2252	120	394	12931	4911	435
mCRPC-5C-6	Post 1st Rim	3	3.89	909	329	124	103.6	333	760	104	50.9	24855	4971	632
mCRPC-5B-3	Post 1st Rim	3	24.77	3599	2679	102	216	97.8	2911	432	107	73200	20340	296
mCRPC-5C-3	Post 1st Rim	4	53.05	58144	8027	369	1242	10000	5599	581	454	168340	59840	604
mCRPC-5C-6	Post 2nd Rim	4	9.36	9580	329	285	103.6	200000	22702	283	71.9	222765	4977	1081

[truncated: 12 more sheets: Fig3C, Fig4A, Fig4B, Sup Fig4, Sup Fig5A, Sup Fig5B, Sup Fig 5C, Sup Fig 5D, Sup Fig6, Sup Fig7, Sup Fig8, Sup Fig9]
